# Supplementary material for: Increased sighing during sleep as a marker of multiple system atrophy
Source: PubMed Central journal article supplement — NPJ Parkinsons Dis. 2024 Sep 16;10:176. doi: 10.1038/s41531-024-00765-4 (PMC11405711; doi:10.1038/s41531-024-00765-4), 2024-09-16
Supplement: 41531_2024_765_MOESM1_ESM.pdf [file 41531_2024_765_MOESM1_ESM.pdf]

**Supplemental Figure A.** Flow chart of participants' selection

REM: rapid eye movement sleep; iRBD: isolated REM sleep behavior disorder; PD: Parkinson's disease; MSA: multisystem atrophy; TST: total sleep time; AHI: apnea-hypopnea index

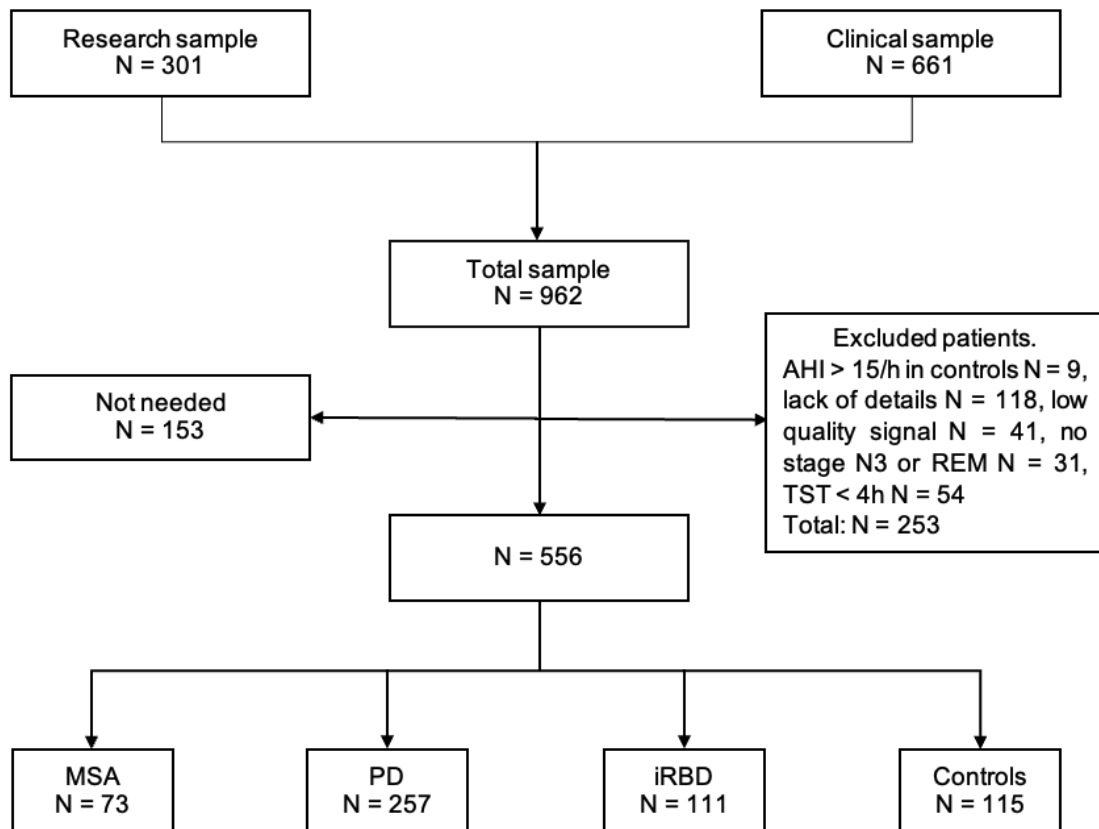

**Supplemental Table A. Demographic characteristics and polysomnographic measures of patients with multiple system atrophy (MSA), Parkinson's disease (PD), isolated REM sleep behavior disorder (iRBD) and controls**

|                                            | <b>MSA<br/>A</b> | <b>PD<br/>B</b> | <b>iRBD<br/>C</b> | <b>Controls<br/>D</b> | <b>P value</b> | <b>Post-hoc test</b>    |
|--------------------------------------------|------------------|-----------------|-------------------|-----------------------|----------------|-------------------------|
| <b>Number</b>                              | 73               | 257             | 111               | 115                   | —              | —                       |
| <b>Sex, female N (%)</b>                   | 42 (57.5)        | 78 (30.4)       | 23 (20.7)         | 68 (59.1)             | <.001          | A = D > B = C           |
| <b>Age, y</b>                              | 63.0 (9.0)       | 65.4 (10.2)     | 67.2 (9.0)        | 62.6 (7.7)            | <.001          | A < C, B = C > D        |
| <b>Benzodiazepine N (%)</b>                | 6 (8.22)         | 21 (8.2)        | 13 (11.61)        | 10 (8.7)              | 0.754          |                         |
| <b>Antidepressants N (%)</b>               | 34 (46.58)       | 59 (23.05)      | 13 (11.61)        | 16 (13.91)            | <.001          | A > B > C = D           |
| <b>Total sleep time, min</b>               | 385.4 (75.0)     | 389 (79.2)      | 432.9 (84.8)      | 402.3 (71)            | <.001          | A = B < C, C > D        |
| <b>Sleep efficiency, %</b>                 | 77.1 (10.4)      | 79.2 (11.8)     | 80.9 (9.4)        | 81.5 (11)             | 0.022          | A < D                   |
| <b>Latency to, min</b>                     |                  |                 |                   |                       |                |                         |
| <b>Sleep</b>                               | 28.6 (27.3)      | 19.3 (23.8)     | 25.1 (20.5)       | 21.9 (19.8)           | 0.009          | A > B                   |
| <b>REM sleep</b>                           | 168.7 (116.2)    | 147.5 (91.8)    | 115.9 (79)        | 105.2 (63.3)          | <.001          | A = B > C = D           |
| <b>Sleep stages, % of total sleep time</b> |                  |                 |                   |                       |                |                         |
| <b>N1</b>                                  | 4.7 (3.8)        | 4.9 (4.9)       | 5.4 (4.4)         | 3.7 (3)               | 0.024          | C > D                   |
| <b>N2</b>                                  | 52.4 (14)        | 52.8 (13.3)     | 51.8 (9.8)        | 52.3 (9.2)            | 0.894          |                         |
| <b>N3</b>                                  | 25.9 (9.6)       | 25.2 (12.3)     | 23.4 (9.5)        | 21.3 (11.6)           | 0.01           | A = B > D               |
| <b>REM</b>                                 | 17.4 (9.2)       | 17.2 (8.2)      | 19.8 (7)          | 19.2 (5.4)            | 0.005          | B < C                   |
| <b>Apnea-hypopnea index, /h</b>            | 14.0 (17.3)      | 8.8 (11.2)      | 10 (13.7)         | 4.8 (4.2)             | <.001          | A > B, A > D, B = C > D |
| <b>Obstructive</b>                         | 9.7 (17.4)       | 13.2 (31)       | 14.3 (28.5)       | 4.2 (8.6)             | 0.009          | B = C > D               |
| <b>Mixed</b>                               | 1.7 (6.7)        | 1.4 (9.6)       | 0.7 (4.1)         | 0 (0)                 | 0.291          |                         |
| <b>Central</b>                             | 9.6 (20.7)       | 4.8 (21.4)      | 2.8 (6.7)         | 0.7 (1.1)             | 0.003          | A > C = D               |
| <b>Minimal oxygen saturation, %</b>        | 85.7 (5.9)       | 85.9 (8.2)      | 86.6 (6.5)        | 87.9 (4.5)            | 0.009          | NA                      |
| <b>Periodic leg movement index, /h</b>     | 45.4 (56.7)      | 13.5 (26.5)     | 18.7 (24.3)       | 8.8 (17)              | <.001          | A > B = C = D           |
| <b>Arousal index, /h</b>                   | 10.1 (7.9)       | 9.2 (7.4)       | 13.1 (9.8)        | 9 (5.9)               | 0.001          | B = D < C               |

Data are mean (SD) or N (%)

**Supplemental Table B. The Bayes Factor of the model (BF<sub>M</sub>) or the probability of the model knowing the data (p(M|data)) indicates that the model including the groups far outweighs the null model of which one is a certainty.**

| <b>Models comparison</b> | <b>P(M)</b> | <b>P(M data)</b>       | <b>BF<sub>M</sub></b>  | <b>BF<sub>10</sub></b> | <b>Error %</b>         |
|--------------------------|-------------|------------------------|------------------------|------------------------|------------------------|
| <b>Group</b>             | 0.500       | 1.000                  | $3.237 \times 10^{+8}$ | 1.000                  |                        |
| <b>Null model</b>        | 0.500       | $3.089 \times 10^{-9}$ | $3.089 \times 10^{-9}$ | $3.089 \times 10^{-9}$ | $1.318 \times 10^{-4}$ |

**Supplemental Table C. The group with MSA are different from the other groups with extreme evidence (BF>100). There are no differences between the subjects suffering from PD compared to the group of subjects iRBD and VS (BF<3) as well as the subjects iRBD compared to the control.**

**Post Hoc Tests Comparisons - Groups**

| <b>Group 1</b> | <b>Group 2</b> | <b>Prior Odds</b> | <b>Posterior Odds</b>  | <b>BF<sub>10</sub></b> | <b>Error %</b>          |
|----------------|----------------|-------------------|------------------------|------------------------|-------------------------|
| <b>MSA</b>     | <b>PD</b>      | 1.000             | $1.813 \times 10^{+6}$ | $1.813 \times 10^{+6}$ | $8.276 \times 10^{-13}$ |
|                | <b>iRBD</b>    | 1.000             | 111792.289             | 111792.289             | $7.473 \times 10^{-12}$ |
|                | <b>Control</b> | 1.000             | 797.114                | 797.114                | $2.518 \times 10^{-9}$  |
| <b>PD</b>      | <b>iRBD</b>    | 1.000             | 0.205                  | 0.205                  | 0.073                   |
|                | <b>Control</b> | 1.000             | 0.198                  | 0.198                  | 0.076                   |
| <b>iRBD</b>    | <b>Control</b> | 1.000             | 1.044                  | 1.044                  | 0.017                   |

**Supplemental Table D. Autonomic measures ( orthostatic hypotension, number of stools/week,) smell performances**

| <b>RBD patients</b>            | <b>Threshold &gt; 3.4</b> | <b>Threshold &lt; 3.4</b> | <b>P-Value</b> |
|--------------------------------|---------------------------|---------------------------|----------------|
|                                | n = 11                    | n = 100                   |                |
| <b>Orthostatic hypotension</b> |                           |                           |                |
| N                              | 6/11                      | 75/100                    |                |
| N (%)                          | 1 (9.1)                   | 7 (6.9)                   | 0.473          |
| <b>Constipation</b>            |                           |                           |                |
| N                              | 6/11                      | 75 / 100                  |                |
| N (%)                          | 2 (18.2)                  | 27 (26.7)                 | 0.569          |
| Number of stools/week          | 4.5 (2.3)                 | 3.1 (2.4)                 | 0.166          |
| <b>Smell performances</b>      |                           |                           |                |
| N                              | 4/11                      | 61 / 100                  |                |
| Normal > 8 / 12                | 1 (25)                    | 20 (32.7)                 | 0.6374         |

## **Legend of the Supplementary video-clips**

### **Supplementary video clip 1**

Video, sound and cardiorespiratory monitoring during N3 sleep in an MSA participant with sighs in ambient air (epoch of 5 min). The visible sigh is silent; however, chest movement and shoulders lifting are visible during the sigh. This is the most common case.

### **Supplementary video clip 2**

Video, sound and cardiorespiratory monitoring during N3 sleep in an MSA participant with stridor (epoch of 5 min) in ambient air. When a sigh occurs during a stridorous respiration, a sharp noise can be heard during the sigh, which first manifests as an increase in stridor during the inspiratory phase of the sigh and later as a short moaning during the expiratory phase. During the central apnea following the sigh, there is no sound or catathrenia.
